# Supplementary material for: The efficiency of migration and profile control with emulsion systems in class III reservoirs
Source: R Soc Open Sci. 2019 May 22;6(5):181634. doi: 10.1098/rsos.181634 (PMC6549995; doi:10.1098/rsos.181634)
Supplement: all figures [file rsos181634supp1.docx]

**Figures：**

1-Plunger pump; 2-Beaker; 3-Middle container; 4-Pressure gange; 5-Core holder; 6-Graduated cylinder; 7-Manual pump; 8-Oven

Fig.1 Experimental-process diagram


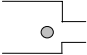

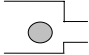

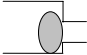


(a) (b) (c)

Fig.2 Matching relationship between the droplets of emulsion and the diameter of the pore throat

Fig.3 Viscosity of emulsions under different surfactant concentrations

Fig.4 FR when emulsions with different water cut flow through 20mD core

Fig.5 FR when emulsions with different water cut flow through 40mD core

Fig.6 FR when emulsions with different water cut flow through 60mD core

Fig.7 FR when emulsions with different water cut flow through 80mD core

Fig.8 FR when emulsions with different surfactant concentrations flow through 20mD core

Fig.9 FR when emulsions with different surfactant concentrations flow through 40mD core

Fig.10 FR when emulsions with different surfactant concentrations flow through 60mD core

Fig.11 FR when emulsions with different surfactant concentrations flow through 80mD core


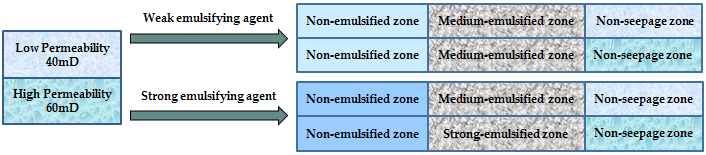


Fig.12 Profile control enficacy when the permeability contrast is 1.5


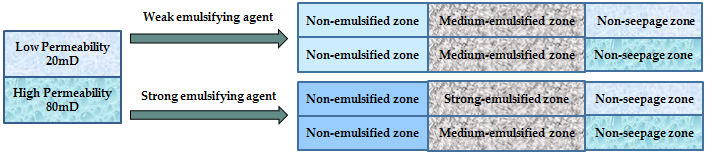


Fig.13 Profile control enficacy when the permeability contrast is 4
