# Supplementary material for: The efficiency of migration and profile control with emulsion systems in class III reservoirs
Source: R Soc Open Sci. 2019 May 22;6(5):181634. doi: 10.1098/rsos.181634 (PMC6549995; doi:10.1098/rsos.181634)
Supplement: drawing of partial figures [file rsos181634supp3.xlsx]

## Sheet: Different water cut
Pore diameter of 20mD core（µm）	Water cut（%）	Diameter of emulsion（µm）	De/Dp	Outlet size of emulsion（%）		Pore diameter of 40mD core（µm）	Water cut（%）	Diameter of emulsion（µm）	De/Dp	Outlet size of emulsion（%）		Pore diameter of 60mD core（µm）	Water cut（%）	Diameter of emulsion（µm）	De/Dp	Outlet size of emulsion（%）		Pore diameter of 80mD core（µm）	Water cut（%）	Diameter of emulsion（µm）	De/Dp	Outlet size of emulsion（%）
1.804	30	1.136	0.629712	7.69		3.126	30	1.136	0.363404	5.64		4.615	30	1.136	0.246154	4.69		5.923	30	1.136	0.191795	5.17
	40	1.975	1.09479	9.78			40	1.975	0.631798	7.23			40	1.975	0.427952	5.39			40	1.975	0.333446	5.37
	50	2.891	1.60255	11.26			50	2.891	0.924824	9.65			50	2.891	0.626436	7.06			50	2.891	0.488097	6.89
	60	2.131	1.18126	10.23			60	2.131	0.681702	10.01			60	2.131	0.461755	9.34			60	2.131	0.359784	7.71
	70	1.342	0.743902	8.72			70	1.342	0.429303	12.45			70	1.342	0.290791	10.32			70	1.342	0.226574	9.64
20mDResistance coefficient
PV/water cut	0.3	0.4	0.5	0.6	0.7
0	0.3	1	0.9975	1	1
0.5	7.11905	23.8095	18.525	13.8095	5.47619
1	18.1071	45.4762	33.8438	24.4048	13.9286
1.5	26.5881	61.1905	47.2387	37.8333	20.4524
2	34.0476	71.4286	57	47.619	26.1905
2.5	40.3619	82.1429	64.9325	55.5714	31.0476
3	46.6143	90	71.155	59.4286	35.8571
3.5	51.3521	91.8825	77.4028	65.6921	39.5016
4	55.1515	93.1385	80.3182	70.9956	42.4242
4.5	57.5869	93.7286	81.6169	72.2976	44.2976
5	60.988	94.271	82.4216	73.1043	46.9138
5.5	64.6942	94.4524	82.8914	73.5753	49.7648
6	65.1392	63.9355	83.5869	74.2726	50.1071
6.5	65.9511	61.4303	63.8637	74.5411	50.7316
7	66.0062	58.4489	65.455	74.5835	50.774
7.5	66.0833	65.7056	68.1457	61.1736	50.8333
8	53.7643	67.9048	65.4092	65.5732	41.3571
8.5	55.6479	78.3095	73.574	68.9965	42.8061
9	57.7149	75.381	75.1601	63.4437	44.3961
9.5	55.5905	80.0714	72.2237	71.7143	42.7619
10	59.181	85.619	79.7525	73.7143	45.5238
40mDResistance coefficient
PV/water cut	0.3	0.4	0.5	0.6	0.7
0	0.576	0.21	1.69	0.88825	1
0.5	7.95429	6.62619	9.25476	16.4961	6.19048
1	14.0571	16.8536	23.5393	30.1371	9.64286
1.5	21.792	24.7474	34.5645	42.065	13.7857
2	27.4286	31.6905	44.2619	50.7571	18.3095
2.5	32.0091	37.5676	52.4705	57.8208	22.9524
3	34.2309	43.3871	60.5986	63.3618	25.8571
3.5	37.8386	47.7969	66.7577	68.9254	27.5968
4	40.8935	51.3333	71.6969	71.5214	30.9956
4.5	41.6434	53.6001	74.8629	72.6779	33.1071
5	42.1081	56.7657	79.2844	73.3944	35.0091
5.5	42.3794	60.2154	80.0786	73.8128	35.4801
6	42.781	60.6295	80.6571	74.4322	36.1774
6.5	42.9357	61.3852	81.7126	75.0109	36.4459
7	42.9601	61.4366	81.7843	74.9415	36.4883
7.5	43.8646	61.5083	81.8845	59.4523	36.5476
8	43.7701	61.9231	73.9174	60.3602	36.5952
8.5	43.742	52.5572	76.3661	59.1713	30.9762
9	40.6579	53.7193	75.0294	66.9283	33.2056
9.5	42.6789	53.096	76.9755	68.5433	33.881
10	41.9109	54.7669	75.6879	68.9028	37.7619
60mDResistance coefficient
PV/water cut	0.3	0.4	0.5	0.6	0.7
0	1	0.8	0.9639	0.8925	1
0.5	5.47619	11.0476	23.085	16.575	6.19048
1	13.9286	19.5238	37.0845	30.2812	9.64286
1.5	20.4524	30.2667	38.5965	42.2662	13.7857
2	26.1905	38.0952	48.465	51	18.3095
2.5	31.0476	44.4571	54.2025	58.0975	22.9524
3	35.8571	47.5429	59.481	63.665	25.8571
3.5	39.5016	52.5536	66.9656	67.1302	27.5968
4	42.4242	56.7965	69.0807	69.7386	30.9956
4.5	44.2976	57.8381	73.956	70.9006	33.1071
5	46.9138	58.4834	74.6658	70.9831	35.0091
5.5	49.7648	58.8602	75.8039	71.191	35.4801
6	50.1071	59.4181	76.0994	70.1713	36.1774
6.5	50.7316	59.6329	76.8138	71.255	36.4459
7	42.7619	59.6762	74.5639	55.1275	30.6429
7.5	43.6905	47.0341	63.9277	54.5974	31.7857
8	43.7143	44.8395	64.4004	56.399	31.5
8.5	47.568	51.3877	66.4376	55.2044	31.2381
9	46.7771	54.5645	65.9097	57.8735	33.2056
9.5	49.9048	55.4667	67.0288	56.6213	31.5
10	50.2857	56.3048	67.878	56.9825	34.4286
80mDResistance coefficient
PV/water cut	0.3	0.4	0.5	0.6	0.7
0	1.04	0.7	0.8	0.8	1
0.5	6.4381	9.66667	14.2857	14.8571	6.19048
1	14.4857	17.0833	27.8095	27.1429	9.64286
1.5	21.2705	26.4833	38.4762	37.8857	13.7857
2	27.8076	33.3333	43.619	45.7143	18.3095
2.5	32.2895	38.9	47.619	52.0762	22.9524
3	37.2914	44.9333	50.0952	58.9714	25.8571
3.5	41.0816	49.3178	60.4584	63.0298	27.5968
4	44.1212	53.0303	62.5429	66.3203	30.9956
4.5	46.0695	53.9417	64.7905	66.3619	33.1071
5	48.7904	54.5064	66.0667	67.0073	35.0091
5.5	49.2802	54.8361	67.8476	67.5905	35.4801
6	50.0054	55.3242	67.5434	67.8667	36.1774
6.5	50.2847	55.5121	67.2395	67.0381	36.4459
7	45.4857	55.35	61.4734	54.8762	36.4883
7.5	39.0743	42.8215	56.374	57.0341	36.5476
8	40.5352	42.5679	57.3238	60.5538	30.4524
8.5	44.5183	48.2976	58.8381	60.2925	30.9762
9	46.172	49.4106	56.019	59.6597	31.0628
9.5	44.4724	50.2	57.8667	59.1143	36.2619
10	47.3448	51.6	58.5714	59.4381	37.7619
